# Supplementary material
Source: publisher figshare collection journal article supplement (https://gsapubs.figshare.com/ndownloader/files/36462441)
Supplement: Supplementary file 1 [file 36462441]

## Sheet: Compilation of Rhyolite Ages
Appendix A.1 - Compilation of 40Ar/39Ar and K-Ar ages for rhyolites referenced in this study and additional histogram results
							Comparing histograms of different bin widths with n = 1000
Dome or Tuff	Rock Type	Material Dated	Weighted Mean Age (Ma)	±2σ	Age Source		Bin width = 0.3 Ma						Bin width = 0.5 Ma						Bin width = 0.7 Ma
Big Obsidian Flow (radiocarbon)	obsidian		0.13		Robinson and Trimble (1983)
Newberry Volcanics (K-Ar)	obsidian		0.6		Fiebelkorn et al. (1983)
Newberry Volcanics (K-Ar)	rhyolite		0.8		Fiebelkorn et al. (1983)
Newberry Volcanics (K-Ar)	rhyolite		0.9		Fiebelkorn et al. (1983)
Newberry Volcanics (K-Ar)	rhyolite		1.1		Fiebelkorn et al. (1983)
Newberry Volcanics (K-Ar)	rhyolite		2.4		Fiebelkorn et al. (1983)
Iron Mountain	rhyolite	biotite	2.89	0.08	Jordan et al. (2004)
Newberry Volcanics (K-Ar)	rhyolite		3.7		Fiebelkorn et al. (1983)
Hampton Tuff	ashflow tuff	sanidine	3.9	0.02	Jordan et al. (2004)
Cougar Mountain	rhyolite	whole rock	4.34	0.05	Ford et al. (2013)
Potato Lake Tuff	ashflow tuff	sanidine	5.13	0.02	Sanville (2015)
Bug Butte (top)	rhyolite	plagioclase	5.17	0.09	Ford et al. (2013)
North Connelly Hills	rhyolite	whole rock	5.59	0.05	Ford et al. (2013)
Juniper Ridge, west	rhyolite	sanidine	5.74	0.02	Jordan et al. (2004)
Juniper Ridge, west*	rhyolite	obsidian	5.78	0.02	Jordan et al. (2004)
Glass Buttes "A"	rhyolite	whole rock	5.79	0.04	Ford et al. (2013)
Fergason Mountain	rhyolite	plagioclase	6.16	0.04	Ford et al. (2013)
Pine Mountain	rhyolite	whole rock	6.25	0.03	Ford et al. (2013)
Palomino Butte	rhyolite	biotite	6.35	0.03	Jordan et al. (2004)
Glass Buttes "E"	rhyolite	whole rock	6.49	0.05	Ford et al. (2013)
Quartz Mountain Pass	rhyolite	biotite	6.79	0.04	Ford et al. (2013)
Cougar Peak (top)	rhyolite	plagioclase	6.87	0.07	Ford et al. (2013)
Elk Butte	rhyolite	biotite	6.9	0.02	Jordan et al. (2004)		*Thin blue lines are to show that graphs are to scale
Juniper Ridge, east	rhyolite	obsidian	6.9	0.02	Jordan et al. (2004)
Rattlesnake Tuff	ashflow tuff	sanidine	7.09	0.02	Jordan et al. (2004)		Comparing histograms of different n values with 0.5 Ma bin width
Egli Ridge, northwest	rhyolite	obsidian	7.13	0.02	Jordan et al. (2004)		n = 500						n = 1000						n = 5000
Wagontire Mountain, east	rhyolite	obsidian	7.17	0.02	Jordan et al. (2004)
Sheep Mountain	rhyolite	sanidine	7.18	0.01	Jordan et al. (2004)
Ram's Butte	rhyolite	sanidine	7.18	0.01	Jordan et al. (2004)
Alkali Buttes	rhyolite	sanidine	7.26	0.05	Ford et al. (2013)
Burns Butte	rhyolite	sanidine	7.68	0.04	Jordan et al. (2004)
Dome south of Cox Flat	rhyolite	sanidine	8.05	0.04	Ford et al. (2013)
Double-O Ranch	rhyolite	plagioclase	8.28	0.05	Jordan et al. (2004)
Prater Creek Tuff	ashflow tuff	groundmass	8.41	0.16	Jordan et al. (2004)
South of Drewsey	rhyolite	sanidine	8.62	0.03	this study
Drake Peak (Trf)	rhyolite	plagioclase	8.96	0.06	Ford et al. (2013)
Devine Canyon Tuff	ashflow tuff	sanidine	9.63	0.05	Ford et al. (2013)
Griffin Creek	rhyolite	sanidine	9.86	0.02	this study
Unidentified Flow #1	rhyolite	sanidine	10.21	0.03	this study
South Fork	rhyolite	sanidine	10.35	0.05	this study
Indian Creek Butte	rhyolite		10.38	0.03	Johnson and Grunder (2000)
Duck Creek Butte	rhyolite	biotite	10.5	0.03	Johnson and Grunder (2000)
Circle Bar	rhyolite	sanidine	10.52	0.02	this study
Circle Bar*	rhyolite	sanidine	10.55	0.03	this study
Dome N of Iron Point	rhyolite	sanidine	10.57	0.03	this study
Star Mountain	rhyolite	sanidine	10.64	0.02	this study
Star Mountain*	rhyolite	sanidine	10.659	0.02	this study§
McEwen Butte	rhyolite	sanidine	10.7		this study§
Mustang Butte	rhyolite	groundmass	10.84	0.04	this study		*Thin blue lines are to show that graphs are to scale
Saddle Butte	rhyolite	sanidine	10.94	0.05	this study
Stockade Mountain	rhyolite	sanidine	11.029	0.013	this study§
Trd N of Stockade Mountain	rhyolite	sanidine	11.08	0.03	this study
Stockade Mountain, proper	rhyolite	sanidine	11.21	0.03	this study
Stockade Mountain, south	rhyolite	sanidine	11.41	0.04	this study
Black Butte	rhyolite	sanidine	11.45	0.02	this study
Visher Creek	rhyolite	sanidine	11.46	0.02	this study
Trd N of Stockade Mountain	rhyolite	sanidine	11.47	0.04	this study
Jump Creek Rhyolite	rhyolite	sanidine	11.6		Bonnichsen et al. (2004)
Iron Point	rhyolite	sanidine	11.84	0.06	this study
Sacramento Butte	rhyolite	sanidine	11.85	0.06	this study
Beaty’s Butte Rhyolite	rhyolite	sanidine	12.05	0.66	Scarberry et al. (2010)
Strawberry Rhyolite	rhyolite	sanidine	14.37	0.02	Dvorak (2021)
McCain Creek	rhyolite	sanidine	14.42	0.04	Jackson (2021)
Dam Rhyolite	rhyolite	plagioclase	14.74	0.02	this study
Dry Creek	rhyolite	sanidine	14.78	0.03	this study
Strawberry Mountain Rhyolite	rhyolite	groundmass	14.79	0.12	Steiner (per. comm.) cited in Hess (2014)
Wagontire Mountain	rhyolite	plagioclase	14.79	0.05	this study
Birch Creek	rhyolite	plagioclase	14.94	0.2	this study
Buchanan Tuff	ashflow tuff	anorthoclase	15.12	0.01	Streck (unpub.)
Dinner Creek Tuff 4	ashflow tuff	anorthoclase	15.24	0.01	Streck et al. (2015)
Strawberry Mountain Rhyolite	rhyolite	groundmass	15.3	0.1	Steiner (per. comm.) cited in Hess (2014)
Dinner Creek Tuff 3	ashflow tuff	anorthoclase	15.46		Streck et al. (2015)
Wildcat Creek Tuff	ashflow tuff	anorthoclase	15.49	0.02	Sales (2018)
Donnelly Butte	rhyolite	groundmass	15.59	0.06	Streck (unpublished)
Dooley Mountain Rhyolite	rhyolite	plagioclase	15.59	0.04	Hess (2014)
Smith Butte rhyolite lava	rhyolite	sanidine	15.61	0.05	Benson and Mahood (2016)
Mahogany Mountain rhyolite	rhyolite	sanidine	15.63	0.06	Benson and Mahood (2016)
Dinner Creek Tuff 2	ashflow tuff	plagioclase	15.66	0.04	Streck et al. (2015)
Mahogany Mountain rhyolite	rhyolite	sanidine	15.71	0.05	Jackson (2021)
Succor Creek Tuff	ashflow tuff	anorthoclase	15.73	0.09	Marcy (2013)
Three Fingers Intra-Caldera Rhyolite	rhyolite	sanidine	15.74	0.08	Marcy (2013)
Young McIntyre Ridge Rhyolite	rhyolite	sanidine	15.76	0.02	Hess (2014)
Mahogany Mntn	rhyolite	plagioclase	15.81	0.06	Jackson (2021)
Three Fingers rhyolite lava	rhyolite	sanidine	15.82	0.06	Benson and Mahood (2016)
Mahogany Mntn	rhyolite	sanidine	15.82	0.05	Jackson (2021)
SE of Round Mountain	rhyolite	sanidine	15.83	0.04	Jackson (2021)
Leslie Gulch Tuff	ashflow tuff	anorthoclase	15.94	0.05	Benson and Mahood (2016)
Old McIntyre Ridge Rhyolite	rhyolite	anorthoclase	15.94	0.16	Hess (2014)
Old McIntyre Ridge Rhyolite	rhyolite	anorthoclase	15.95	0.03	Black (2021)
tuff of Leslie Gulch	ashflow tuff	anorthoclase	15.98	0.05	Black (2021)
basal rhyolite of Leslie Gulch	rhyolite	anorthoclase	16.02	0.012	Streck (unpub.)
Upper Littlefield Rhyolite	rhyolite	plagioclase	16.02		Webb et al. (2018)
Strawberry Mountain Rhyolite	rhyolite	groundmass	16.06	0.17	Steiner (per. comm.) cited in Hess (2014)
Swamp Creek Rhyolite	rhyolite	glass	16.11	0.12	Hess (2014)
Lower Littlefield Rhyolite	rhyolite	plagioclase	16.11		Webb et al. (2018)
Buchanan Dome Complex	rhyolite	sanidine	16.13	0.11	Hess (2014)
Dinner Creek Tuff 1	ashflow tuff	sanidine	16.16	0.02	Streck et al. (2015)
Beulah Reservoir Trd	rhyolite	groundmass	16.29	0.21	Hess (2014)
Unity Rhyolite	rhyolite	feldspar	16.53	0.14	Streck et al. (2017)
Dome E of South Fork	rhyolite	groundmass	16.81	0.05	this study
Unity Rhyolite	rhyolite	plagioclase	17	0.12	Streck et al. (2017)
Drum Hill	rhyolite	plagioclase	17.3	0.09	Ford et al. (2013)
Bald Butte	rhyolite	glass	17.53	0.08	Ford et al. (2013)
Note: All are Ar-Ar ages, unless otherwise specified. Bolded ages are those from this study. Ages with no listed material dated or error are averages of multiple ages. Webb et al. (2018) determined that the Bully Creek and Cottonwood Mountain rhyolites are the same as the Lower Littlefield Rhyolite. Only Jordan et al. (2004) Wagontire Mountain age was included here and in age plots, because K-Ar …
*Age not included in statistical calculations (not part of the 102 total), because it is considered a second age from an eruptive center that has already been dated (an age within error of another sample dated from the same unit)
§Date acquired by New Mexico Institute of Mining and Technology. All other ages by Oregon State University.

## Sheet: Basalt age compilation
Appendix A.2 - Compilation of 40Ar/39Ar ages for Miocene basalts in eastern Oregon used in Histogram Figure
Ages associated with Columbia River Basalt Group were compiled by Dr. Emily Cahoon
Reported 40Ar/39Ar Age	Reported error	Cited Source	General Association
0.139	0.081	Jordan et al. (2004)	Younger HLP mafic and intermediate
0.44		cited in Jordan et al. (2004) as from multiple previous studies	Younger HLP mafic and intermediate
0.74	0.059	Jordan et al. (2004)	Younger HLP mafic and intermediate
1.01	0.07	Jordan et al. (2004)	Younger HLP mafic and intermediate
1.23	0.05	Jordan et al. (2004)	Younger HLP mafic and intermediate
1.47	0.08	Jordan et al. (2004)	Younger HLP mafic and intermediate
1.93	0.29	Millard MS thesis (2010)	Younger HLP mafic and intermediate
1.97	0.21	Jordan et al. (2004)	Younger HLP mafic and intermediate
2.09	0.18	Jordan et al. (2004)	Younger HLP mafic and intermediate
2.09	0.18	Jordan et al. (2004)	Younger HLP mafic and intermediate
2.2	0.04	Jordan et al. (2004)	Younger HLP mafic and intermediate
2.3	0.15	Jordan et al. (2004)	Younger HLP mafic and intermediate
2.37	0.04	Jordan et al. (2004)	Younger HLP mafic and intermediate
2.54	0.07	Jordan et al. (2004)	Younger HLP mafic and intermediate
2.9		cited in Jordan et al. (2004) as from multiple previous studies	Younger HLP mafic and intermediate
2.9		cited in Jordan et al. (2004) as from multiple previous studies	Younger HLP mafic and intermediate
2.92	0.06	Jordan et al. (2004)	Younger HLP mafic and intermediate
3		cited in Jordan et al. (2004) as from multiple previous studies	Younger HLP mafic and intermediate
3.4		cited in Jordan et al. (2004) as from multiple previous studies	Younger HLP mafic and intermediate
3.6		cited in Jordan et al. (2004) as from multiple previous studies	Younger HLP mafic and intermediate
3.7		cited in Jordan et al. (2004) as from multiple previous studies	Younger HLP mafic and intermediate
3.98	0.06	Jordan et al. (2004)	Younger HLP mafic and intermediate
4.2		cited in Jordan et al. (2004) as from multiple previous studies	Younger HLP mafic and intermediate
4.57	2.4	Millard MS thesis (2010)	Younger HLP mafic and intermediate
4.6		cited in Jordan et al. (2004) as from multiple previous studies	Younger HLP mafic and intermediate
4.79	0.11	Jordan et al. (2004)	Younger HLP mafic and intermediate
5.26	0.09	Jordan et al. (2004)	Younger HLP mafic and intermediate
5.44	0.1	Jordan et al. (2004)	Younger HLP mafic and intermediate
5.44	0.1	Jordan et al. (2004)	Younger HLP mafic and intermediate
5.58	0.06	Jordan et al. (2004)	Younger HLP mafic and intermediate
5.58	0.11	Jordan et al. (2004)	Younger HLP mafic and intermediate
5.8		cited in Jordan et al. (2004) as from multiple previous studies	Younger HLP mafic and intermediate
5.89	0.12	Jordan et al. (2004)	Younger HLP mafic and intermediate
5.9	0.09	Jordan et al. (2004)	Younger HLP mafic and intermediate
6.1		cited in Jordan et al. (2004) as from multiple previous studies	Younger HLP mafic and intermediate
6.1		cited in Jordan et al. (2004) as from multiple previous studies	Younger HLP mafic and intermediate
6.3		cited in Jordan et al. (2004) as from multiple previous studies	Younger HLP mafic and intermediate
6.6		cited in Jordan et al. (2004) as from multiple previous studies	Younger HLP mafic and intermediate
6.68	0.4	Jordan et al. (2004)	Younger HLP mafic and intermediate
6.7		cited in Jordan et al. (2004) as from multiple previous studies	Younger HLP mafic and intermediate
6.9		cited in Jordan et al. (2004) as from multiple previous studies	Younger HLP mafic and intermediate
7.08	0.13	Jordan et al. (2004)	Younger HLP mafic and intermediate
7.1		cited in Jordan et al. (2004) as from multiple previous studies	Younger HLP mafic and intermediate
7.21	0.22	Jordan et al. (2004)	Younger HLP mafic and intermediate
7.25	0.09	Millard MS thesis (2010)	Younger HLP mafic and intermediate
7.6	0.11	Jordan et al. (2004)	Younger HLP mafic and intermediate
7.6	0.11	Jordan et al. (2004)	Younger HLP mafic and intermediate
7.68	0.08	Jordan et al. (2004)	Younger HLP mafic and intermediate
7.71	0.21	Scarberry (2007)	Younger HLP mafic and intermediate
7.72	0.23	Scarberry (2007)	Younger HLP mafic and intermediate
7.76	0.13	Jordan et al. (2004)	Younger HLP mafic and intermediate
8.1		cited in Jordan et al. (2004) as from multiple previous studies	Younger HLP mafic and intermediate
8.1		cited in Jordan et al. (2004) as from multiple previous studies	Younger HLP mafic and intermediate
8.21	0.43	Jordan et al. (2004)	Younger HLP mafic and intermediate
8.21	0.43	Jordan et al. (2004)	Younger HLP mafic and intermediate
8.45	0.96	Jordan et al. (2004)	Younger HLP mafic and intermediate
8.69	0.21	Scarberry (2007)	Younger HLP mafic and intermediate
9		cited in Jordan et al. (2004) as from multiple previous studies	Younger HLP mafic and intermediate
9.4		cited in Jordan et al. (2004) as from multiple previous studies	Younger HLP mafic and intermediate
10.1	1.4	Hooper et al. (2002) Keeney Sequence	Keeney Sequence
10.14	0.23	Camp et al. (2003) for Riverside lavas of Keeney Sequence	Keeney Sequence
10.18		Barry et al., 2013	Columbia River Basalt Group
10.3	1.2	Hooper et al. (2002) Keeney Sequence	Keeney Sequence
10.34		Barry et al., 2013	Columbia River Basalt Group
10.4	0.8	Hooper et al. (2002) Keeney Sequence	Keeney Sequence
10.42	0.06	Jordan et al. (2004)	Younger HLP mafic and intermediate
11.21		Barry et al., 2013	Columbia River Basalt Group
11.5	2	Hooper et al. (2002) Keeney Sequence	Keeney Sequence
11.5	0.4	Hooper et al. (2002) Keeney Sequence	Keeney Sequence
11.88	4.87	Millard MS thesis (2010)	Younger HLP mafic and intermediate
12.2	0.2	Hooper et al. (2002) cites Dunnean (1998) Keeney Sequence	Keeney Sequence
12.5	0.05	cited in Camp et al. (2003) for Buck Mtn. of Keeney Sequence because similar to Shumway Basalt from Fiebelkorn et al. (1983)	Keeney Sequence
13.1	0.2	Hooper et al. (2002) cites Dunnean (1998) Prava Peak, Tims Peak	Tims Peak basalt
13.4	3.6	Hooper et al. (2002) Hat Top, Tims Peak	Tims Peak basalt
13.4	0.8	Hooper et al. (2002) Keeney Sequence	Keeney Sequence
13.6	0.2	Hooper et al. (2002) cites Dunnean (1998) Hat Top, Tims Peak	Tims Peak basalt
13.79		Wright et al. (2016) for unit related to Tims Peak	Tims Peak basalt
13.8	0.3	Fiebelkorn et al. (1983) Owyhee Basalt	Owyhee Basalt
13.9	0.2	Hooper et al. (2002) Prava Peak, Tims Peak	Tims Peak basalt
14.1		Fiebelkorn et al. (1983) cites Laursen and Hammond (1974) Owyhee Basalt	Owyhee Basalt
14.4	± 0.4	Hooper et al., 2002 Birch Creek Basalt	Columbia River Basalt Group
14.7	± 0.21	Barry et al., 2010	Columbia River Basalt Group
14.98	± 0.06	Barry et al., 2013	Columbia River Basalt Group
15	0.3	Fiebelkorn et al. (1983) cites Baksi and Watkins (1973), Watkins and Baksi, (1974) and Laursen and Hammond (1974) Owyhee Basalt	Owyhee Basalt
15.07	± 0.07	Barry et al., 2013	Columbia River Basalt Group
15.12	± 0.38	Barry et al., 2010	Columbia River Basalt Group
15.25	± 0.08	Barry et al., 2013	Columbia River Basalt Group
15.27	± 0.18	Barry et al., 2013	Columbia River Basalt Group
15.27	± 0.36	Brueseke et al. (2007)	Columbia River Basalt Group
15.28	± 0.30	Duncan (1982), included in Long and Duncan (1983)	Columbia River Basalt Group
15.28	± 0.74	Lees (1994)	Columbia River Basalt Group
15.29	±0.22	Barry et al., 2010	Columbia River Basalt Group
15.35	± 0.30	Hooper et al. (2002)	Columbia River Basalt Group
15.38	± 0.31	Duncan (1982), included in Long and Duncan (1983)	Columbia River Basalt Group
15.43	± 0.05	Baksi, 2013	Columbia River Basalt Group
15.46	±0.21	Barry et al., 2010	Columbia River Basalt Group
15.48	±0.22	Barry et al., 2010	Columbia River Basalt Group
15.53	±0.20	Barry et al., 2010	Columbia River Basalt Group
15.55	±0.32	Barry et al., 2010	Columbia River Basalt Group
15.55	± 0.10	Hooper et al. (2002)	Columbia River Basalt Group
15.59		Reidel et al. (1989)	Columbia River Basalt Group
15.61	± 0.28	Brueseke et al. (2007)	Columbia River Basalt Group
15.65	± 0.20	Hooper et al. (2002)	Columbia River Basalt Group
15.7	± 0.34	Barry et al., 2010	Columbia River Basalt Group
15.7	±0.49	Barry et al., 2010	Columbia River Basalt Group
15.71	±0.26	Barry et al., 2010	Columbia River Basalt Group
15.75	± 0.31	Hooper et al. (2002)	Columbia River Basalt Group
15.76	± 0.61	Hooper et al. (2002)	Columbia River Basalt Group
15.78	± 0.20	Duncan (1982)	Columbia River Basalt Group
15.8	± 0.30	Duncan (1982), included in Long and Duncan (1983)	Columbia River Basalt Group
15.86	± 0.20	Duncan (1982), included in Long and Duncan (1983)	Columbia River Basalt Group
15.89	±0.60	Barry et al., 2010	Columbia River Basalt Group
15.895	± 0.019	Kasbohm & Schoene, 2018	Columbia River Basalt Group
15.94	±0.20	Barry et al., 2010	Columbia River Basalt Group
15.97	± 0.28	Barry et al., 2013	Columbia River Basalt Group
16.02	± 0.15	Baksi and Farrar (1990)	Columbia River Basalt Group
16.05	± 0.61	Hooper et al. (2002)	Columbia River Basalt Group
16.06	±0.29	Barry et al., 2010	Columbia River Basalt Group
16.06	0.14	Cahoon et al., 2020	Columbia River Basalt Group
16.066	± 0.040	Kasbohm & Schoene, 2018	Columbia River Basalt Group
16.08	±0.67	Barry et al., 2010	Columbia River Basalt Group
16.11	±0.54	Barry et al., 2010	Columbia River Basalt Group
16.14	± 0.30	Swisher et al. (1990)	Columbia River Basalt Group
16.15	± 0.20	Baksi and Farrar (1990)	Columbia River Basalt Group
16.17	± 0.24	Baksi et al. (1991)	Columbia River Basalt Group
16.18	± 0.92	Brueseke and Hart (2008)	Columbia River Basalt Group
16.2	± 0.21	Long and Duncan (1983)	Columbia River Basalt Group
16.2	± 0.21	Duncan (1982), included in Long and Duncan (1983)	Columbia River Basalt Group
16.2	± 0.26	Lees (1994)	Columbia River Basalt Group
16.2	± 0.1	Hooper et al. (2002)	Columbia River Basalt Group
16.2	± 0.10	Barry et al., 2013	Columbia River Basalt Group
16.21	± 0.043	Kasbohm & Schoene, 2018	Columbia River Basalt Group
16.22	± 0.30	Colgan et al. (2006)	Columbia River Basalt Group
16.22	0.06	Cahoon et al., 2020	Columbia River Basalt Group
16.23	0.09	Cahoon et al., 2020	Columbia River Basalt Group
16.25	±0.27	Barry et al., 2010	Columbia River Basalt Group
16.254	± 0.034	Kasbohm & Schoene, 2018	Columbia River Basalt Group
16.26	± 0.11	Baksi and Farrar (1990)	Columbia River Basalt Group
16.28	± 0.24	Jarboe et al., 2010	Columbia River Basalt Group
16.288	± 0.039	Kasbohm & Schoene, 2018	Columbia River Basalt Group
16.3	± 0.40	Lees (1994)	Columbia River Basalt Group
16.3	± 0.2	Baksi et al. (1991)	Columbia River Basalt Group
16.3	± 0.17	Camp et al., 2013	Columbia River Basalt Group
16.35	± 0.50	Brueseke et al. (2007)	Columbia River Basalt Group
16.36	± 0.12	Baksi and Farrar (1990)	Columbia River Basalt Group
16.4	± 0.51	Camp et al., 2013	Columbia River Basalt Group
16.41	± 0.20	Camp et al., 2013	Columbia River Basalt Group
16.42	± 0.07	Baksi, 2013	Columbia River Basalt Group
16.42	± 0.20	Brueseke et al. (2007)	Columbia River Basalt Group
16.42	± 0.29	Colgan et al. (2006)	Columbia River Basalt Group
16.44	± 0.20	Brueseke et al. (2007)	Columbia River Basalt Group
16.45	± 0.11	Jarboe et al., 2010	Columbia River Basalt Group
16.46	± 0.47	Jarboe et al., 2010	Columbia River Basalt Group
16.51	± 0.05	Baksi, 2013	Columbia River Basalt Group
16.51	± 0.81	Camp et al., 2013	Columbia River Basalt Group
16.51	± 0.18	Brueseke et al. (2007)	Columbia River Basalt Group
16.511	± 0.042	Jarboe et al., 2008	Columbia River Basalt Group
16.53	± 0.12	Jarboe et al., 2010	Columbia River Basalt Group
16.54	± 0.28	Camp et al., 2013	Columbia River Basalt Group
16.56	± 0.34	Brueseke and Hart (2008)	Columbia River Basalt Group
16.572	± 0.018	Kasbohm & Schoene, 2018	Columbia River Basalt Group
16.589	± 0.031	Kasbohm & Schoene, 2018	Columbia River Basalt Group
16.59	± 0.30	Brueseke et al. (2007)	Columbia River Basalt Group
16.6	± 1.2	Brueseke and Hart (2008)	Columbia River Basalt Group
16.603	± 0.028/0.36	Kasbohm & Schoene, 2018	Columbia River Basalt Group
16.61	± 0.28	Jarboe et al., 2010	Columbia River Basalt Group
16.62	0.07	Cahoon et al., 2020	Columbia River Basalt Group
16.65	± 0.17	Jarboe et al., 2010	Columbia River Basalt Group
16.653	± 0.063	Kasbohm & Schoene, 2018	Columbia River Basalt Group
16.66	± 0.1	Brueseke et al. (2007)	Columbia River Basalt Group
16.67	± 0.25	Jarboe et al., 2010	Columbia River Basalt Group
16.68	± 0.95	Colgan et al. (2006)	Columbia River Basalt Group
16.69	± 0.1	Brueseke et al. (2007)	Columbia River Basalt Group
16.69	± 0.18	Brueseke et al. (2007)	Columbia River Basalt Group
16.69	± 0.14	Jarboe et al., 2008	Columbia River Basalt Group
16.7	± 0.4	Rahl et al. (2002)	Columbia River Basalt Group
16.7	± 0.2	Swisher et al. (1990)	Columbia River Basalt Group
16.7	± 0.2	Baksi and Farrar (1990)	Columbia River Basalt Group
16.7	0.09	Cahoon et al., 2020	Columbia River Basalt Group
16.71	± 0.38	Jarboe et al., 2008	Columbia River Basalt Group
16.72	± 0.08	Jarboe et al., 2010	Columbia River Basalt Group
16.72	± 0.21	Jarboe et al., 2008	Columbia River Basalt Group
16.72	± 0.28	Jarboe et al., 2008	Columbia River Basalt Group
16.72	0.03	Cahoon et al., 2020	Columbia River Basalt Group
16.74	± 0.36	Jarboe et al., 2010	Columbia River Basalt Group
16.74	± 0.21	Camp et al., 2013	Columbia River Basalt Group
16.81	± 0.05	Baksi, 2013	Columbia River Basalt Group
16.82	± 0.22	Camp et al., 2013	Columbia River Basalt Group
16.84	± 0.43	Camp et al., 2013	Columbia River Basalt Group
16.84	± 0.04	Brueseke and Hart (2008)	Columbia River Basalt Group
16.85	± 0.21	Jarboe et al., 2010	Columbia River Basalt Group
16.88	0.06	Cahoon et al., 2020	Columbia River Basalt Group
16.93	± 0.10	Baksi, 2013	Columbia River Basalt Group
16.96	0.07	Cahoon et al., 2020	Columbia River Basalt Group
16.97	± 0.06	Brueseke et al. (2007)	Columbia River Basalt Group
17	± 1.6	Hooper et al., 2002	Columbia River Basalt Group
17.02	0.03	Cahoon et al., 2020	Columbia River Basalt Group
17.06	± 1.3	Scarberry et al. (2010)	Columbia River Basalt Group
17.14	± 0.36	Jarboe et al., 2008	Columbia River Basalt Group
17.23	0.04	Cahoon et al., 2020	Columbia River Basalt Group
17.5	± 1.8	Colgan et al. (2006)	Columbia River Basalt Group

## Sheet: Comp. map with sample locations
Appendix A.3 - Compilation map denoting sample locations from this study and units samples and dated in previous studies
																					High Lava Plains extent from Ford et al. (2013). Map sources include Ferns et al. (1993a; 1993b), Greene et al. (1972), Jenks et al. (2004), Jordan et al., (2004), Jenks et al. (2007), Ford et al. (2013), Streck et al. (2015), Webb et al. (2018). DITEC – Dinner Creek Eruptive Center from Streck et al. (2015).

## Sheet: Sample Coordinates - This Study
Appendix A.4 - Coordinates for samples dated in this study
Sample ID	Unit	N	W
EJ-12-19	South of Drewsey	43.7652	-118.3884
EJ-12-21B	Griffin Creek	43.8562	-118.535
MS-13-09	McEwen Butte	43.4295	-118.146
MS-13-10	Visher Creek	43.4413	-118.161
MS-17-DAM	Dam Rhyolite	43.8482	-119.065
VS17-001	Stockade Mountain	43.3257	-117.982
VS17-003	Star Mountain	43.328	-117.987
VS17-020	Star Mountain	43.3758	-117.972
VS17-034	Stockade Mountain, south	43.2323	-117.96
VS17-035	Mustang Butte	43.1482	-117.96
VS17-043	Saddle Butte	43.0792	-117.886
VS17-045	Iron Point	43.1605	-117.676
VS17-046B	Dome N of Iron Point	43.2299	-117.699
VS17-054	Unidentified Flow #1	43.2533	-118.582
VS17-056	South Fork	43.2013	-118.389
VS17-065	Sacramento Butte	43.1718	-117.769
VS19-068	Birch Creek	43.22501	-117.49149
VS19-079	Birch Creek	43.20147	-117.49844
VS19-080	Dome E of South Fork	43.17888	-118.32916
VS19-085	Circle Bar	43.34163	-118.43841
VS19-089	Circle Bar	43.33466	-118.42896
VS19-093	Unidentified Flow #2	43.14429	-118.57260
VS19-098	Stockade Mountain, proper	43.32189	-118.03763
VS19-101	Trd N of Stockade Mountain	43.40198	-118.09597
VS19-104	Trd N of Stockade Mountain	43.43911	-118.07902
VS19-106	Black Butte	43.69795	-118.18732
VS19-109	North of Drewsey	43.79390	-118.38275
VS19-116	Dry Creek	43.59030	-117.57714
VS20-125A	Wagontire Mountain	43.34240	-119.86750
